# Supplementary material
Source: Springer Nature journal article supplement (https://www.springermedizin.de/resource/supplementary/12865_2008_237_MOESM5_ESM.pdf/9427578)

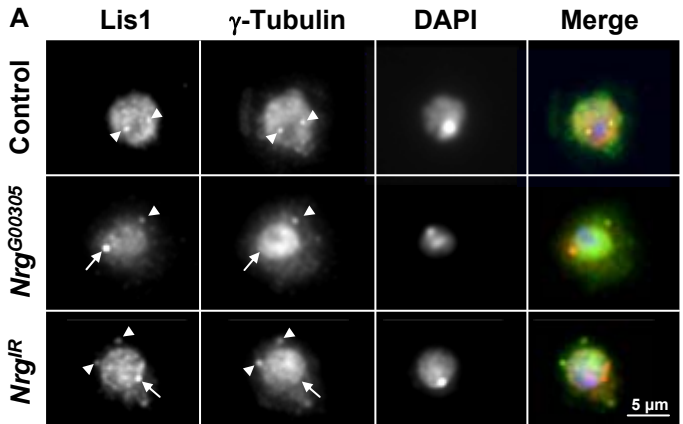

Red = Lis1 Green =  $\gamma$ -Tubulin Blue = DAPI

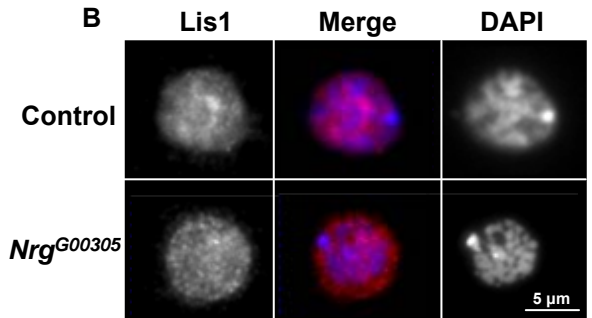

Red = Lis1 Blue = DAPI

Supplement: MOESM5 [file 9427578]
